# Supplementary material for: Clonal dynamics in a case of acute monoblastic leukemia that later developed myeloproliferative neoplasm
Source: Springer Nature journal article supplement (doi:10.1007/s12185-018-2419-1), 2018-02-07
Supplement: MOESM4 [file 15445644]

## Sheet: Sheet1
Supplemental Table 2. List of primer sequences for amplicon-based deep sequencing
Gene	Chr	Start	End	Forward Primer	Reverse Primer
ASH1L	1	155322575	155322575	5'-AAAAAGAACGAATTTGAAGGTGGTTATAGT-3'	5'-CTCCTTGTTTCCTGTAACTTAATTTTCACT-3'
CACNA1E	1	181767704	181767704	5'-CCAAGCTCTGGAGAGCAACAAT-3'	5'-TGTCACTTAGCAGGTTGTTGACAG-3'
PLEKHG5	1	6527928	6527928	5'-CAGTGAGCGTGGAGTTAAGC-3'	5'-ACAGGAAGAGGTGTGGAGAC-3'
DOCK10	2	225651995	225651995	5'-AGATATGACCGATGAATGTCGTAGTAGA-3'	5'-TGGAAACCAAGTTTCAGGCATGA-3'
GATA2	3	128205688	128205688	5'-TCGATTCCTGCGGATCCTAC-3'	5'-CACAACTACATGGAACCCGC-3'
TET2	4	106162508	106162508	5'-GTGGCACATTTTCTAATAGATCAGTCCA-3'	5'-ATTTACAATTGTTTACTGCTTTGTGTGTGA-3'
NPM1	5	170837543	170837543	5'-TGTCTATGAAGTGTTGTGGTTCC-3'	5'-CAAGCAAAGGGTGGAGTTCC-3'
JAK2	9	5073770	5073770	5'-TGTATCCTCATCTATAGTCATGCTGAAAGT-3'	5'-CTGAATAGTCCTACAGTGTTTTCAGTTTC-3'
CBL	11	119148979	119148979	5'-TATACTGTGAGATGGGCTCCACAT-3'	5'-GCAAAAGATAGTAACAGATGCATCTGAAAA-3'
PCDH9	13	67800298	67800298	5'-CGATGATGGCAATCATGATGGTT-3'	5'-GTAGCAGAAGTTTTTGCAGTGGA-3'
GABRG3	15	27271921	27271921	5'-ATACAAGTAAGAATCTCTCATCCTTCGAGA-3'	5'-GCATGATAAATCTCAAACAGAAATCCACA-3'
GLG1	16	74496062	74496062	5'-ATGGCCTTCAATTCACCAGATCA-3'	5'-GCCAGATCAAAAGCAGGCATTT-3'
TUBB3	16	89999939	89999939	5'-GACTTCAGAGTACAGGCTCTTAGGA-3'	5'-TGGAGAGATGAGTTCCCACCATT-3'
SRSF2	17	74732959	74732959	5'-CCTCAGCCCCGTTTACCTG-3'	5'-ACCGCTACACCAAGGAGTC-3'
ASXL1	20	31022441	31022441	5'-GTGGTTAAAGGTCAGCCCACTT-3'	5'-GGCAGTAGTTGTGTTCGCTGTA-3'
GNAS	20	57484420	57484420	5'-CGTGTCTTTCTTTTTCTCCCAGCTT-3'	5'-GGAGGAGGACAGCTGGTTATTC-3'
HRH3	20	60791772	60791772	5'-AAGAAGGTGACGCTGAGGAA-3'	5'-TTCCTGCTGTACGGACCAG-3'
PAXBP1	21	34131545	34131545	5'-TTTTTGCATTCTTACCTTTTCACTGAAACA-3'	5'-CAGAGGAAAAGATGCCATTCCAAATATTTT-3'
IL17RA	22	17578720	17578720	5'-CTGAGCTGTTTGCTGTCTAGCT-3'	5'-CGGATCCTTATAGCACTAAATTTGAACCC-3'
RP1-130H16.18-TBC1D10A	22	30690965	30690965	5'-GGGCAGGTACTTCTCACAGATC-3'	5'-GCAGATCACCTTCCCTCTCAAG-3'
DNAL4	22	39176938	39176938	5'-CCAGACTGAATGCTTCCAAGGA-3'	5'-CTACCTGCTGTCCATGCCTTAA-3'
KIAA1210	X	118242362	118242362	5'-CCCACTGTAGATGAGGAAAAGAAGG-3'	5'-AAGAATAATTATTTTGGCAGCAACATTCCA-3'
